# Supplementary material
Source: PubMed Central journal article supplement (PMC3302654)
Supplement: pro0020-2113-SD1.pdf [file pro0020-2113-SD1.pdf]

## **SUPPLEMENTARY INFORMATION**

### **Unfurling of the band 4.1, ezrin, radixin, moesin (FERM) domain of the merlin tumor suppressor**

**S.D. Yogesha,<sup>1</sup> Andrew J. Sharff,<sup>2</sup> Marco Giovannini,<sup>3</sup> Gerard Bricogne,<sup>2</sup> and Tina Izard<sup>1\*</sup>**

#### **Supplementary Materials and Methods**

##### ***Liquid chromatography/mass spectrometry analyses of merlin head:tail crystals***

Merlin head:tail crystals were washed twice in reservoir solution (0.2 M ammonium sulfate and 5% PEG 4000) and then dissolved in 10 mM Tris (pH 8). The dissolved crystals were treated with 0.5 mM DTT for 1 hr at 37 °C, followed by treatment with 2 mM iodoacetamide for 1 hr at ambient temperature, to reduce and carbamidomethylate cysteine residues. The protein was subjected to proteolysis with trypsin (35 ng) and the resulting merlin peptides were analyzed by liquid chromatography coupled with tandem mass spectrometry (LC-MS/MS) by our in-house proteomics core. The resulting peptides were first loaded onto a 360 × 100 μm fused silica capillary (PolyMicro Technologies, Phoenix, AZ) pre-column packed with 3 cm of C12 packing material (Jupiter Proteo C12, 4 μm particle size). Salts were removed by washing with 0.1 M acetic acid in 1% acetonitrile and the column was placed in line with a 360 × 100 μm fused silica capillary column packed with 20 cm of C12 material. The peptides were eluted with a gradient consisting of 5% to 55% acetonitrile in 50 min, using a 1,100 series HPLC pump (Agilent Technologies, Santa Clara, CA). A flow rate of 200 nl/min was achieved at the reverse phase column by splitting the flow delivered from the HPLC. Peptides were gradient-eluted and ionized (1.7 kV) by placing a nano-electrospray ionization source (Triversa Nanomate, Advion, Ithaca, NY) into an LTQ-Orbitrap mass spectrometer (Thermo Scientific, San Jose, CA). The LTQ-Orbitrap instrument was operated in a data-dependent mode with dynamic exclusion enabled. The data-dependent method consisted of acquisition of a full scan mass spectrum (m/z 350 – 2000) using the Orbitrap as the analyzer, followed by ten tandem mass spectra (MS/MS) of the ten most abundant ions in the initial full scan. Precursor ions selected for MS/MS were fragmented by collision-activated dissociation (CAD), and the MS/MS scans were acquired using the ion trap as the analyzer. Data were processed using a raw file processing pipeline that extracts tandem mass spectra from the raw data files, which filters the data for spectral quality using the SPEQUAL algorithm,<sup>1</sup> and concatenates the high-quality spectra for database searching via a clustered version of Mascot.<sup>2</sup> Searches were performed against the IPI human protein database. Mascot search results were loaded into Scaffold (Proteome Software, Portland, OR) for statistical analysis followed by manual verification of all peptide assignments. All of the merlin peptides detected are presented in the Supplementary Table.

## SUPPLEMENTARY INFORMATION

### Supplementary Figure Legends

**Supplementary Figure S1.** Unfurling of the merlin F2 domain. The F1 subdomain (residues 20-82 and 91-100) is shown in yellow, the F2 subdomain (residues 101-158 and 178-215) is shown in green, and the F3 motif (residues 216-313) is shown in magenta.

(A) Zoomed-in stereo view of the final  $2F_o-F_c$  electron density map of the F2  $\alpha$ 3- $\alpha$ 4 loop region. The contour level of the electron density map is  $1\sigma$  and the resolution is 2.64 Å. Water molecules are shown as a red sphere. Oxygen atoms are in red, nitrogen in blue and carbon in yellow, green, or magenta for the F1-F3 subdomain, respectively. Some residues are labeled.

(B) Zoomed-out view of the merlin dimer looking down the dyad in the same orientation as in panel (A). Some secondary structure elements are labeled with the extension 'b' indicating its location on the F2 subdomain. Residues from the F2  $\alpha$ 3- $\alpha$ 4 loop are shown in ball-and-stick representation with the remainder of the molecule as a cartoon. The black square indicates the region that is shown in panel (A).

**Supplementary Figure S2.** Unfurling of the merlin F2 subdomain is likely triggered by the tail domain.

(A) Superposition our 2.64 Å unfurled merlin FERM domain (yellow, green, and magenta) onto the 3 Å full-length moesin crystal structure (white, black, and red; PDB entry 2i1k) and the 2.1 Å truncated moesin crystal structure (grey; PDB entry 2i1j). In the full-length moesin structure, the C-terminus (indicated by an arrow that points at moesin residue 320) of the moesin 'A'  $\alpha$ -helix (labeled, shown in black, residues 299-320) would have to shift to allow the unfurling of its F2 subdomain.

(B) Superposition of our unfurled merlin structure (orange) onto the moesin head:tail structure (white and black) and the closed, unbound merlin head structure (PDB entry 1h4r; cyan). Both molecules in the asymmetric unit are shown for the moesin head:tail complex and for the closed, unbound merlin FERM structures. The former are very similar with *r.m.s.d.* of 0.14 Å for 2,174 atoms. While the loop succeeding  $\beta$ -strand  $\beta$ 6c in our unfurled merlin structure resembles that of the closed moesin head:tail structure (indicated by one arrow on the right), there is further movement in the  $\alpha$ -helix  $\alpha$ 3b and its following loop (indicated by two arrows on the left) in the moesin head:tail structure (green) when compared to the closed, unbound merlin head structure (cyan).

## **SUPPLEMENTARY INFORMATION**

**Supplementary Figure S3.** Sequence alignment of the FERM domains of moesin versus merlin.

Residues that are identical in the two structures are indicated by an asterisk in the moesin (Moe) sequence (top sequence). The F1, F2, and F3 subdomains are indicated. The four  $\alpha$ -helices are highlighted in red (moesin residues 95-112, merlin residues 112-128), yellow (moesin residues 118-135, merlin residues 135-150), green (moesin residues 164-179, merlin residues 181-196), and blue (moesin residues 183-196, merlin residues 202-213), respectively. The  $\alpha$ -helix  $\alpha$ 2b is disordered in our unfurled structure of the merlin head domain. Underlined merlin residues (83-90 and 159-177) indicate disordered regions. A period above the moesin sequence indicates that this residue is involved in the moesin head:tail interface as seen in the crystal structure.<sup>3</sup> Italicized merlin residues in blue font indicate the region that unfurls, which is distinct from any FERM domain structure determined thus far. There are 22 identical residues in the merlin 150-201 region while there are 27 and 38 identical residues in the merlin 98-149 and 202-253 regions, respectively.

## **REFERENCES**

1. Purvine S, Kolker N, Kolker E (2004) Spectral quality assessment for high-throughput tandem mass spectrometry proteomics. *OMICS* 8:255-265.
2. Perkins DN, Pappin DJ, Creasy DM, Cottrell JS (1999) Probability-based protein identification by searching sequence databases using mass spectrometry data. *Electrophoresis* 20:3551-3567.
3. Pearson MA, Reczek D, Bretscher A, Karplus PA (2000) Structure of the ERM protein moesin reveals the FERM domain fold masked by an extended actin binding tail domain. *Cell* 101:259-270.

Supplementary Figure S1

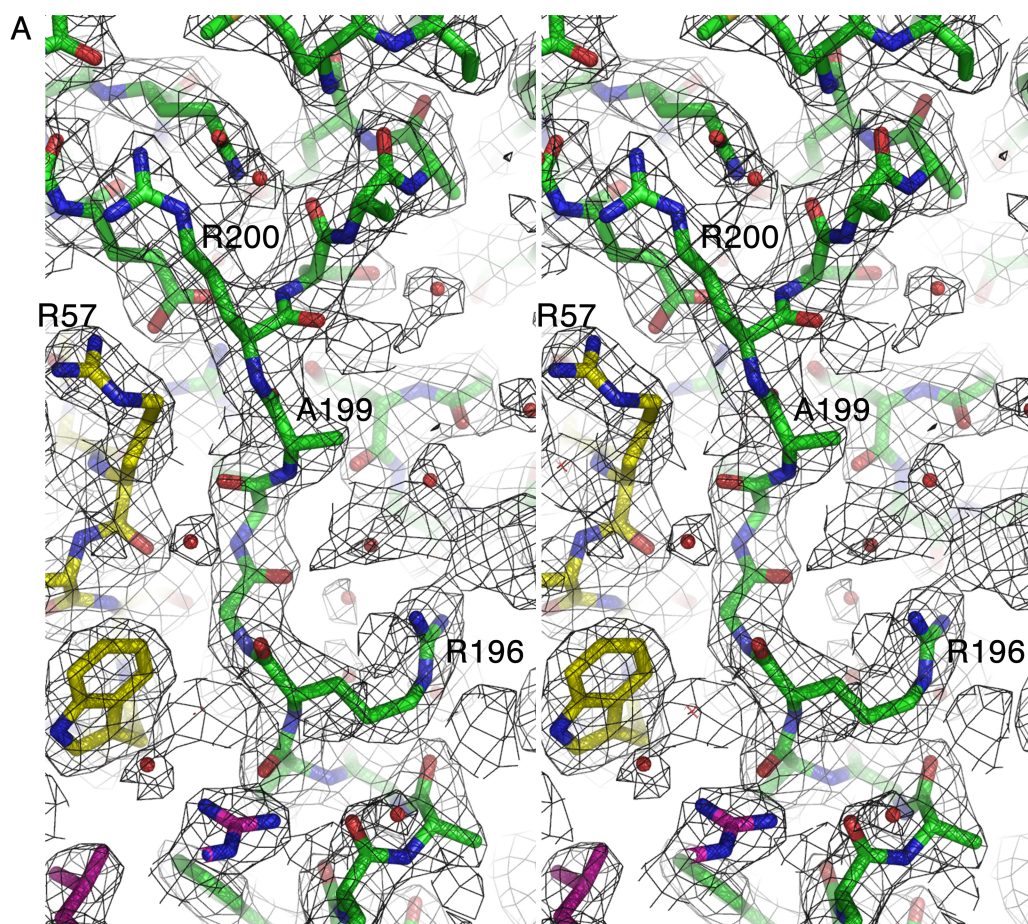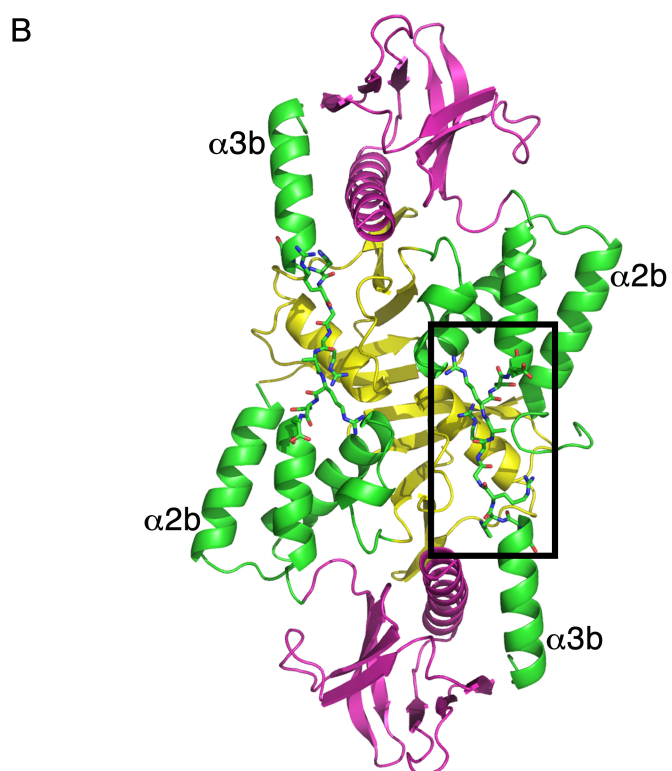

Supplementary Figure S2

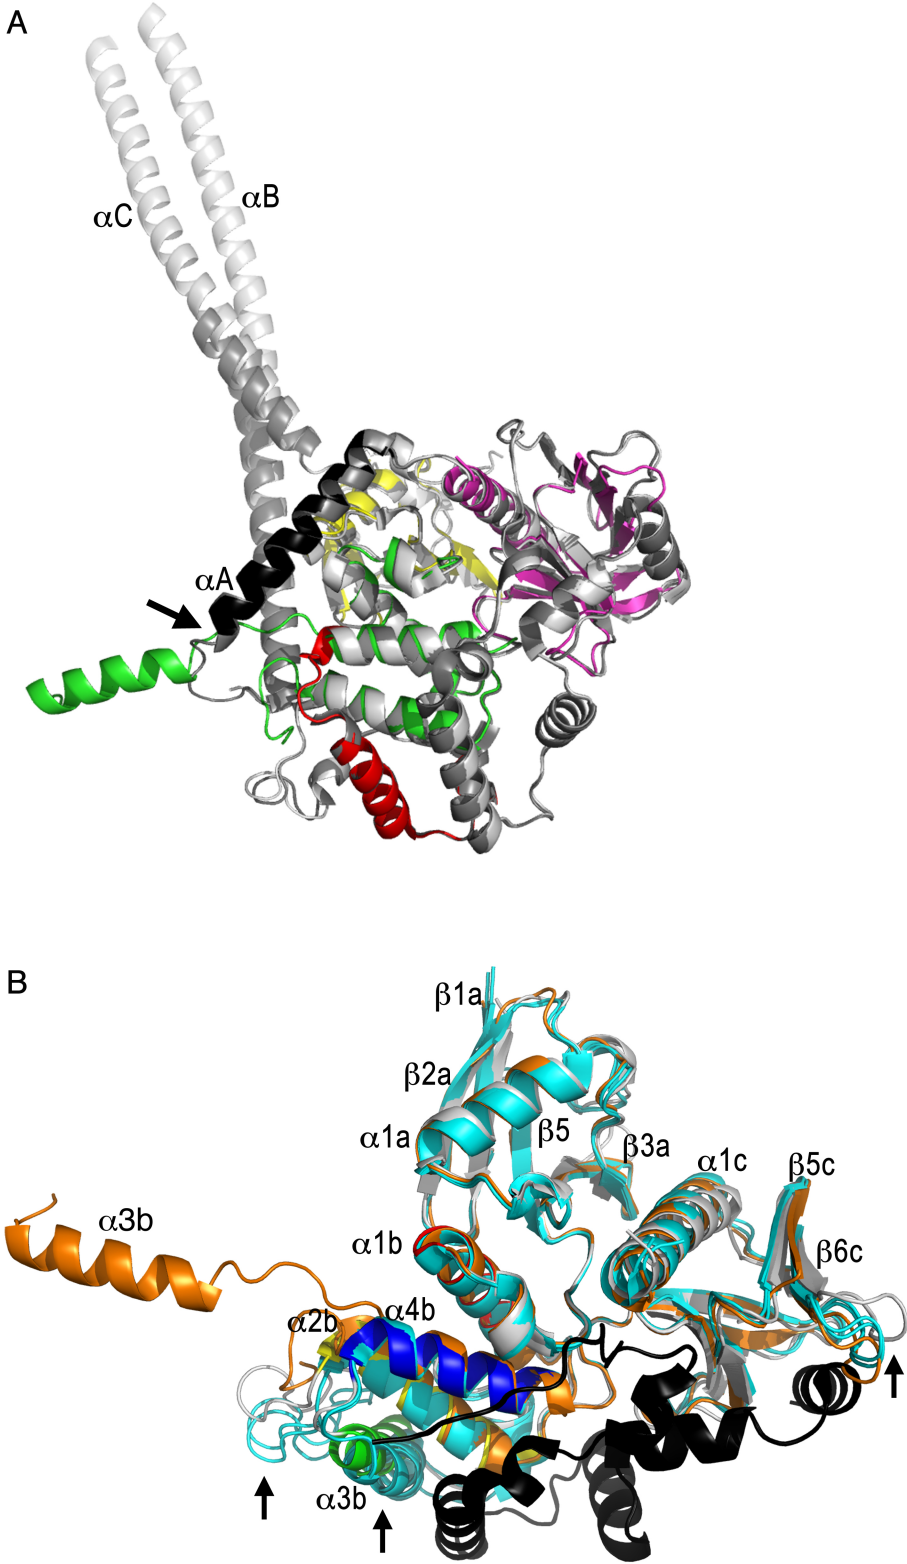

Supplementary Figure S3

F1 Moe 4 \*IS\*\*VT\*\*\*\*\*L\*\*AIQPNTT\*\*Q\*\*\*Q\*VK\*I\*\*\*\*V\*\*\*\*\* 49  
Mer 20 TFTVRIVTMDAEMEFNCEMKWKGKDLFDLVCRTLGLRETWFFGLQY 66  
  
Moe 50 QDT\*GFST\*\*\*LN\*\*\*TAQ\*\*R\*\*S\*LL\*K\*R\*\*\*\*\*DVS\*\*\*I 94  
Mer 67 T-IKDTVAVLKMDKKVLDHDVSKEEPVTFHFLAKFYPENAEELV 110

F2 Moe 95 \*D\*\*\*R\*\*\*\*\*EG\*\*NDD\*\*\*TA\*\*\*\*\*S\*\*\*\*FNK 139  
Mer 111 QEITQHLFFLQVKQILDEKIYCPPEASVLLASYAVQAKYGDYDP 155

Moe 140 E\*\*\*S\*YL\*GDK\*\*\*Q\*\*LEQHKLNKDQ\*\*\*\*\*QV\*HE\*\*\*M 182  
Mer 156 SVHKRGFLAQELLPKRVINLYQMTPEMWEERITAWYAEHRGR 198

Moe 183 L\*ED\*VL\*\*\*\*\* 201  
Mer 199 ARDEAEMEYLKIAQLEMY 217

F3 Moe 202 \*\*\*\*\*S\*K\*\*\*\*\*S\*\*W\*\*\*\*\*N\*\*EQND\*\*\*\*\*G\*\*\*S\*\*\*\*\* 248  
Mer 218 GVN<sup>Y</sup>FAIRNKKGTELLLGVDALGLHIYDPENRLTPKISFPWNEIRNI 264

Moe 249 \*FN\*\*K\*V\*\*\*I\*\*\*APD\*V\*YAPR\*\*I\*\*R\*\*A\*\*M\*\*\*E\*Y\*\*\*\*\*P 297  
Mer 265 SYSDKEFTIKPLDKKIDVFKFNSSKLRVNKLILQLCIGNHDLFMR<sup>RRR</sup>K- 311

**Supplementary Table. Peptides identified from MS/MS.** Peptides identified in the mass spectrometric experiment are listed. Amino acids listed as lower case letters indicate that this amino acid is modified: c, carbamidomethylated cysteine and m, oxidized methionine. For simplicity only one peptide was listed for each possible modification since the masses identified are the same. Theoretical masses were calculated and compared to observed masses to determine part per million errors. The table lists all observed masses for each peptide. Note that peptides were identified for both the head and the tail domain of our crystals and thus confirming that our crystals contain both domains, in particular the tail domain, which is disordered in our structure.

| Peptide sequence        | Residues | Theoretical (monoisotopic) |          |          |          | Observed (monoisotopic) |          |          |          | Error calculations (PPM) |       |       |       |  |
|-------------------------|----------|----------------------------|----------|----------|----------|-------------------------|----------|----------|----------|--------------------------|-------|-------|-------|--|
|                         |          | MH+1                       | MH+2     | MH+3     | MH+4     | MH+1                    | MH+2     | MH+3     | MH+4     | +1                       | +2    | +3    | +4    |  |
| IVTMDAEMEFNcEMK         | 26-40    | 1847.7682                  | 924.3878 | 616.5943 | 462.6975 |                         | 924.3881 | 616.5937 |          |                          | 0.32  | -0.97 |       |  |
| IVTMDAEMEFNcEmK         | 26-40    | 1863.7632                  | 932.3852 | 621.9259 | 466.6962 |                         | 932.3848 | 621.925  |          |                          | -0.43 | -1.45 |       |  |
| IVTmDAEMEFNcEmK         | 26-40    | 1879.7581                  | 940.3827 | 627.2575 | 470.695  |                         | 940.3805 | 627.2562 |          |                          | -2.34 | -2.07 |       |  |
| IVTMDAEMEFNcEmKWK       | 26-42    | 2177.9374                  | 1089.472 | 726.6507 | 545.2398 |                         | 1089.474 | 726.6511 |          |                          | 1.56  | 0.55  |       |  |
| IVTmDAEMEFNcEmKWK       | 26-42    | 2193.9323                  | 1097.47  | 731.9823 | 549.2385 |                         | 1097.47  | 731.9813 |          |                          | -0.09 | -1.37 |       |  |
| IVTmDAEmEFNcEmK         | 26-40    | 1895.753                   | 948.3801 | 632.5892 | 474.6937 |                         | 948.3798 | 632.5884 |          |                          | -0.32 | -1.26 |       |  |
| GKDLFDLVcR              | 43-52    | 1222.6249                  | 611.8161 | 408.2161 | 306.4117 | 1222.624                | 611.8145 |          |          | -0.41                    | -2.62 |       |       |  |
| DLFDLVcR                | 45-52    | 1037.5084                  | 519.2579 | 346.5077 |          | 1037.508                | 519.2554 |          |          | 0.00                     | -4.81 |       |       |  |
| KVLDHDVSKEEPVTFHFLAK    | 80-99    | 2339.2394                  | 1170.123 | 780.418  | 585.5653 |                         |          | 780.418  | 585.5646 |                          |       | 0.00  | -1.20 |  |
| VLDHDVSK                | 81-88    | 912.4785                   | 456.7429 | 304.831  |          | 912.4783                | 456.7418 | 304.8305 |          | -0.22                    | -2.41 | -1.64 |       |  |
| VLDHDVSKEEPVTFHFLAK     | 81-99    | 2211.1444                  | 1106.076 | 737.7197 | 553.5416 |                         | 1106.074 | 737.7186 | 553.5414 |                          | -1.72 | -1.49 | -0.36 |  |
| EETVTFHFLAK             | 89-99    | 1317.6838                  | 659.3455 | 439.8994 | 330.1764 | 1317.684                | 659.3446 | 439.8979 |          | 0.15                     | -1.36 | -3.41 |       |  |
| FYPENAEELVQEITQHLFFLQVK | 100-123  | 2951.4826                  | 1476.245 | 984.499  | 738.6261 |                         | 1476.242 | 984.4991 | 738.6259 |                          | -2.10 | 0.10  | -0.27 |  |
| KQILDEK                 | 124-130  | 873.504                    | 437.2556 |          |          | 873.5035                | 437.2545 |          |          | -0.57                    | -2.52 |       |       |  |
| QILDEK                  | 125-130  | 745.409                    | 373.2082 |          |          | 745.408                 | 373.2071 |          |          | -1.34                    | -2.95 |       |       |  |
| IYcPPEASVLLASYAVQAK     | 131-149  | 2080.0783                  | 1040.543 | 694.031  | 520.775  |                         | 1040.54  | 694.0291 |          |                          | -3.08 | -2.74 |       |  |
| YGDYDPSVHK              | 150-159  | 1180.5269                  | 590.7671 | 394.1805 |          | 1180.526                | 590.7658 | 394.1789 |          | -0.42                    | -2.20 | -4.06 |       |  |
| YGDYDPSVHKR             | 150-160  | 1336.628                   | 668.8177 | 446.2142 | 334.9125 | 1336.626                | 668.8159 | 446.2123 | 334.9117 | -1.27                    | -2.69 | -4.26 | -2.39 |  |
| GFLAQEELPK              | 161-171  | 1244.6885                  | 622.8479 | 415.5677 | 311.9276 | 1244.688                | 622.8467 | 415.5675 |          | -0.08                    | -1.93 | -0.48 |       |  |
| GFLAQEELPKR             | 161-172  | 1400.7896                  | 700.8985 | 467.6014 | 350.9529 |                         | 700.8981 | 467.6003 |          |                          | -0.57 | -2.35 |       |  |
| RVINLYQMTPEMWEER        | 172-187  | 2095.0099                  | 1048.009 | 699.0082 | 524.5079 |                         | 1048.01  | 699.0079 | 524.5071 |                          | 1.43  | -0.43 | -1.53 |  |
| RVINLYQMTPEmWEER        | 172-187  | 2111.0049                  | 1056.006 | 704.3398 | 528.5067 |                         | 1056.007 | 704.3386 |          |                          | 0.38  | -1.70 |       |  |
| RVINLYQmTPEmWEER        | 172-187  | 2126.9998                  | 1064.004 | 709.6714 | 532.5054 |                         | 1064.004 | 709.6699 |          |                          | 0.28  | -2.11 |       |  |
| VINLYQMTPEMWEER         | 173-187  | 1938.9088                  | 969.9581 | 646.9745 | 485.4827 |                         | 969.9578 | 646.9737 |          |                          | -0.31 | -1.24 |       |  |
| VINLYQMTPEmWEER         | 173-187  | 1954.9037                  | 977.9555 | 652.3061 | 489.4814 |                         | 977.9514 | 652.304  |          |                          | -4.19 | -3.22 |       |  |

|                        |          |                            |          |          |          |                         |          |          |          |                          |       |       |       |       |
|------------------------|----------|----------------------------|----------|----------|----------|-------------------------|----------|----------|----------|--------------------------|-------|-------|-------|-------|
| VINLYQmTPEmWEER        | 173-187  | 1970.8987                  | 985.953  | 657.6377 | 493.4801 |                         | 985.9514 | 657.6366 |          |                          | -1.62 | -1.67 |       |       |
| ITAWYAEHR              | 188-196  | 1146.5691                  | 573.7882 | 382.8612 |          | 1146.567                | 573.7858 | 382.8591 |          |                          | -1.92 | -4.18 | -5.49 |       |
| ARDEAEEMEYLK           | 199-209  | 1354.6307                  | 677.819  | 452.2151 | 339.4131 |                         | 677.8171 | 452.213  |          |                          | -2.80 | -4.64 |       |       |
| ARDEAEEmEYLK           | 199-209  | 1370.6257                  | 685.8165 | 457.5467 | 343.4119 | 1370.623                | 685.8146 | 457.5447 |          |                          | -1.75 | -2.77 | -4.37 |       |
| DEAEEMEYLK             | 201-209  | 1127.4925                  | 564.2499 | 376.5024 |          | 1127.493                | 564.2488 |          |          |                          | 0.35  | -1.95 |       |       |
| DEAEEmEYLK             | 201-209  | 1143.4874                  | 572.2474 | 381.834  |          | 1143.488                | 572.2466 |          |          |                          | 0.52  | -1.40 |       |       |
| IAQDLEMYGVNYFAIR       | 210-225  | 1902.9418                  | 951.9746 | 634.9855 | 476.4909 |                         | 951.9744 | 634.985  |          |                          | -0.21 | -0.79 |       |       |
| IAQDLEmYGVNYFAIR       | 210-225  | 1918.9368                  | 959.972  | 640.3171 | 480.4896 |                         | 959.9689 | 640.3151 |          |                          | -3.23 | -3.12 |       |       |
| KGTELLLGVDALGLHIYDPENR | 228-249  | 2423.2929                  | 1212.15  | 808.4358 | 606.5787 |                         | 1212.151 | 808.4365 | 606.5786 |                          | 0.66  | 0.87  | -0.16 |       |
| GTELLLGVDALGLHIYDPENR  | 229-249  | 2295.1979                  | 1148.103 | 765.7375 | 574.5549 |                         | 1148.104 | 765.7373 | 574.5546 |                          | 0.78  | -0.26 | -0.52 |       |
| ISFPWNEIR              | 254-262  | 1161.6051                  | 581.3062 | 387.8732 |          | 1161.606                | 581.3057 |          |          |                          | 0.60  | -0.86 |       |       |
| NISYSDKEFTIKPLDK       | 263-278  | 1897.9906                  | 949.4989 | 633.335  | 475.2531 |                         | 949.4984 | 633.34   | 475.2523 |                          | -0.53 | 7.89  | -1.68 |       |
| EFTIKPLDK              | 270-278  | 1090.6143                  | 545.8108 | 364.2096 |          | 1090.617                | 545.8099 | 364.2089 |          |                          | 2.29  | -1.65 | -1.92 |       |
| EFTIKPLDKK             | 270-279  | 1218.7093                  | 609.8583 | 406.9079 | 305.4328 | 1218.707                | 609.8571 | 406.9068 | 305.4322 |                          | -1.72 | -1.97 | -2.70 | -1.96 |
| KIDVFK                 | 279-284  | 749.4556                   | 375.2314 |          |          | 749.455                 | 375.2308 |          |          |                          | -0.80 | -1.60 |       |       |
| IDVFKFNSSK             | 280-289  | 1184.631                   | 592.8191 | 395.5485 |          |                         | 592.8181 | 395.548  |          |                          | -1.69 | -1.26 |       |       |
| LILQLcIGNHDLFmR        | 295-309  | 1858.9666                  | 929.9869 | 620.3271 | 465.4971 |                         | 929.9875 | 620.327  |          |                          | 0.65  | -0.16 |       |       |
| LSmEIEKEK              | 517-525  | 1122.5711                  | 561.7892 | 374.8619 |          |                         | 561.7877 | 374.8612 |          |                          | -2.67 | -1.87 |       |       |
| LSmEIEK                | 517-523  | 865.4335                   | 433.2204 |          |          |                         | 433.2195 |          |          |                          | -2.08 |       |       |       |
| SKHLQEQLNELKTEIEALK    | 532-550  | 2251.2292                  | 1126.118 | 751.0813 | 563.5628 |                         |          | 751.0811 | 563.5618 |                          | -0.27 | -1.77 |       |       |
| HLQEQLNELKTEIEALK      | 534-550  | 2036.1022                  | 1018.555 | 679.3723 | 509.781  |                         | 1018.556 | 679.3724 | 509.7802 |                          | 0.69  | 0.15  | -1.57 |       |
| TEIEALK                | 544-550  | 803.4509                   | 402.2291 |          |          | 803.4506                | 402.2284 |          |          |                          | -0.37 | -1.74 |       |       |
| ERETALDILHNENSDR       | 553-568  | 1911.9155                  | 956.4614 | 637.9767 | 478.7343 |                         |          | 637.9765 | 478.7336 |                          | -0.31 | -1.46 |       |       |
| ETALDILHNENSDR         | 555-568  | 1626.7718                  | 813.8895 | 542.9288 | 407.4484 |                         | 813.8898 | 542.928  |          |                          | 0.37  | -1.47 |       |       |
| VAFFEEL                | 589-595  | 854.4294                   | 427.7184 |          |          | 854.4294                |          |          |          |                          | 0.00  |       |       |       |
| Peptide sequence       | Residues | MH+1                       | MH+2     | MH+3     | MH+4     | MH+1                    | MH+2     | MH+3     | MH+4     | +1                       | +2    | +3    | +4    |       |
|                        |          | Theoretical (monoisotopic) |          |          |          | Observed (monoisotopic) |          |          |          | Error calculations (PPM) |       |       |       |       |
